# Supplementary material
Source: PubMed Central journal article supplement (PMC3737715)
Supplement: supp_140.16.3323_DEV096537.pdf [file supp_140.16.3323_DEV096537.pdf]

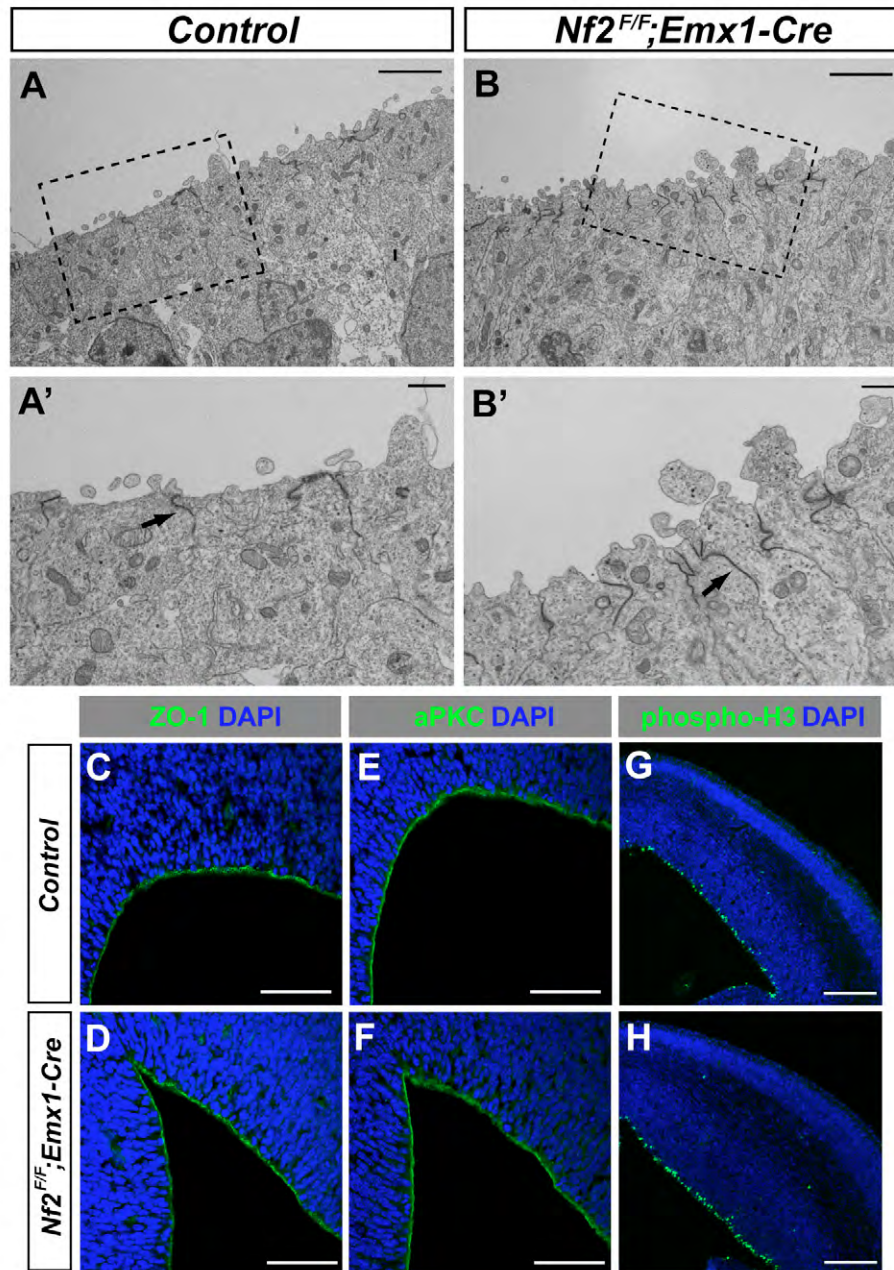

**Fig. S1. The apical junctions and polarity of NPCs are unaffected in *Nf2* mutant dorsal telencephalons.** (A-B') Transmission electron microscopy of E15.5 brains show that the apical junctions (arrows) are intact in the *Nf2<sup>F/F</sup>;Emx1-Cre* dorsal telencephalon. A' and B' are magnified views of the dashed boxes in A and B, respectively. (C-H) Immunostaining shows that, in the E15.5 *Nf2<sup>F/F</sup>;Emx1-Cre* cortex, the apical junctional component ZO-1, the apical polarity protein aPKC and mitotic NPCs (labeled by phospho-H3) are all properly localized at the apical/ventricular surface. Scale bars: 4  $\mu\text{m}$  in A,B; 1  $\mu\text{m}$  in A',B'; 50  $\mu\text{m}$  in C-F; 200  $\mu\text{m}$  in G,H.

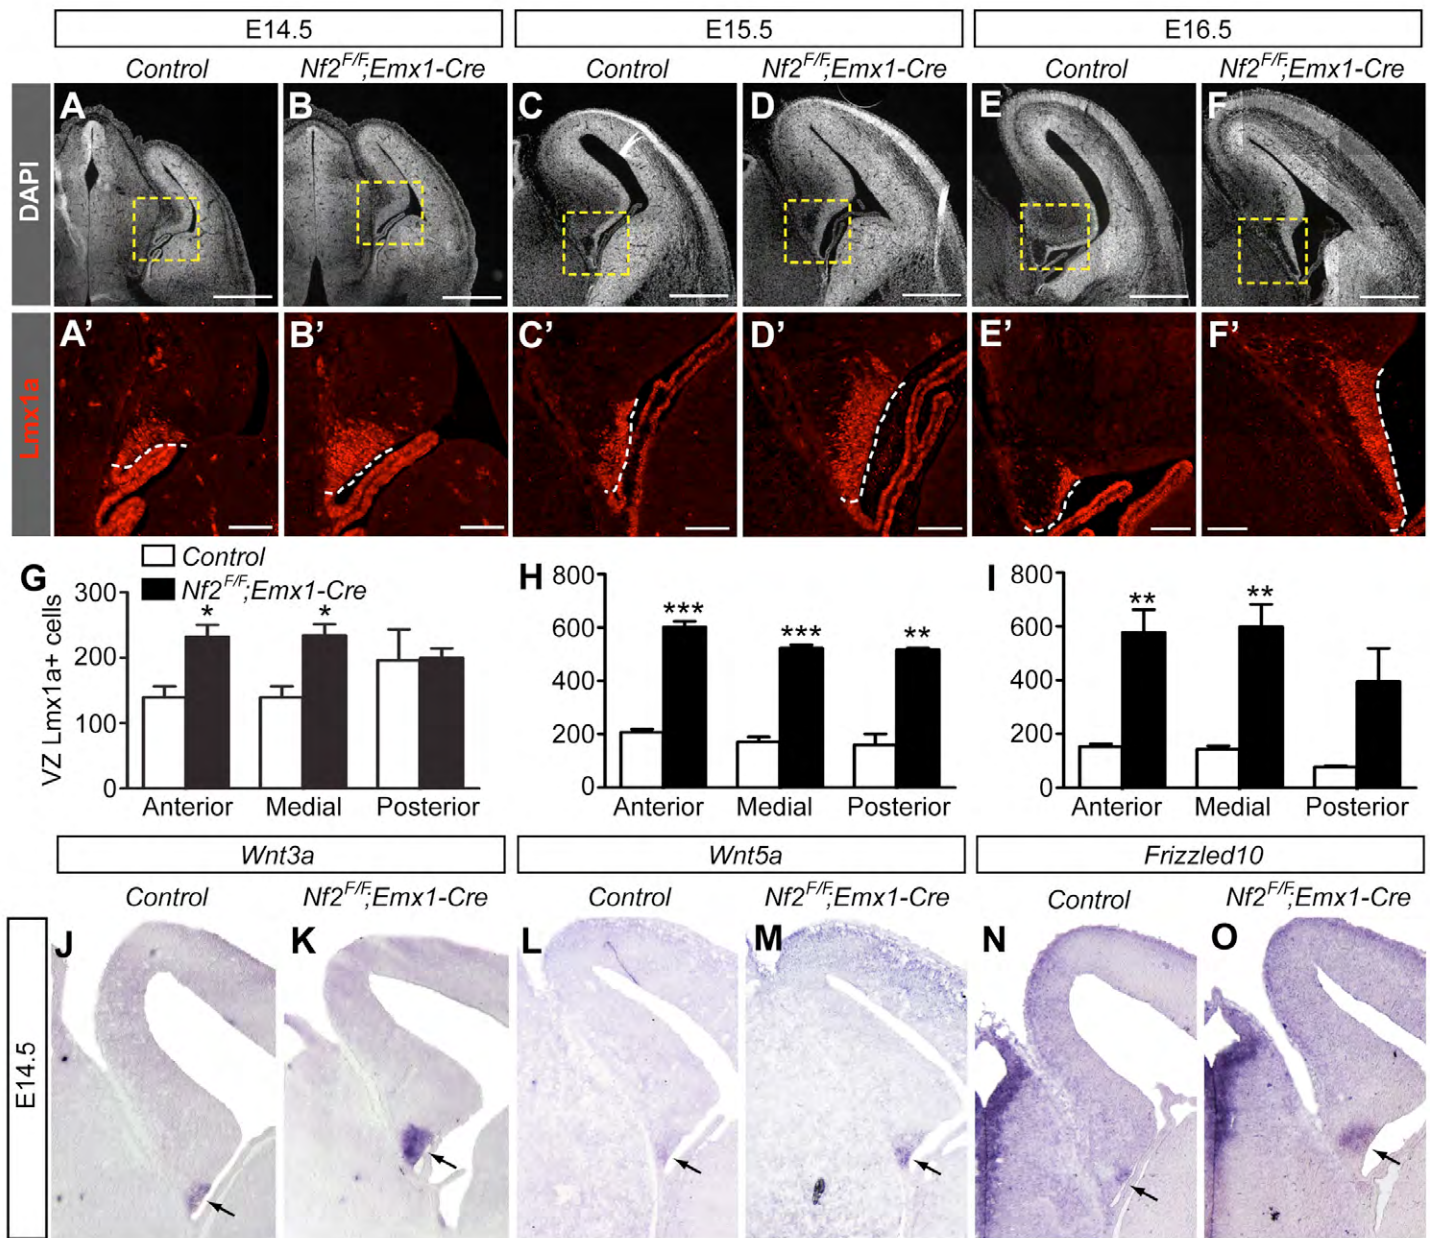

**Fig. S2. The cortical hem is markedly enlarged in *Nf2* mutant embryos.** (A-F') Images of the dorsal telencephalon (shown by DAPI staining) and cortical hem (labeled by *Lmx1a*, delineated by dashed lines) show that the hem is markedly enlarged in *Nf2<sup>F/F</sup>;*Emx1-Cre embryos. (G-I) Quantifications of the number of VZ *Lmx1a*<sup>+</sup> hem cells per section along the anterior-posterior axis of the hem structure at E14.5 (G), E15.5 (H) and E16.5 (I). Values are mean  $\pm$  s.e.m. of three embryos. \* $P < 0.05$ , \*\* $P < 0.01$ , \*\*\* $P < 0.001$ . (J-O) *In situ* hybridizations on E14.5 brain sections show that the *Nf2<sup>F/F</sup>;*Emx1-Cre hem expresses the hem markers *Wnt3a*, *Wnt5a* and *Fzd10*. Scale bars: 500  $\mu$ m in A-F; 100  $\mu$ m in A'-F'.

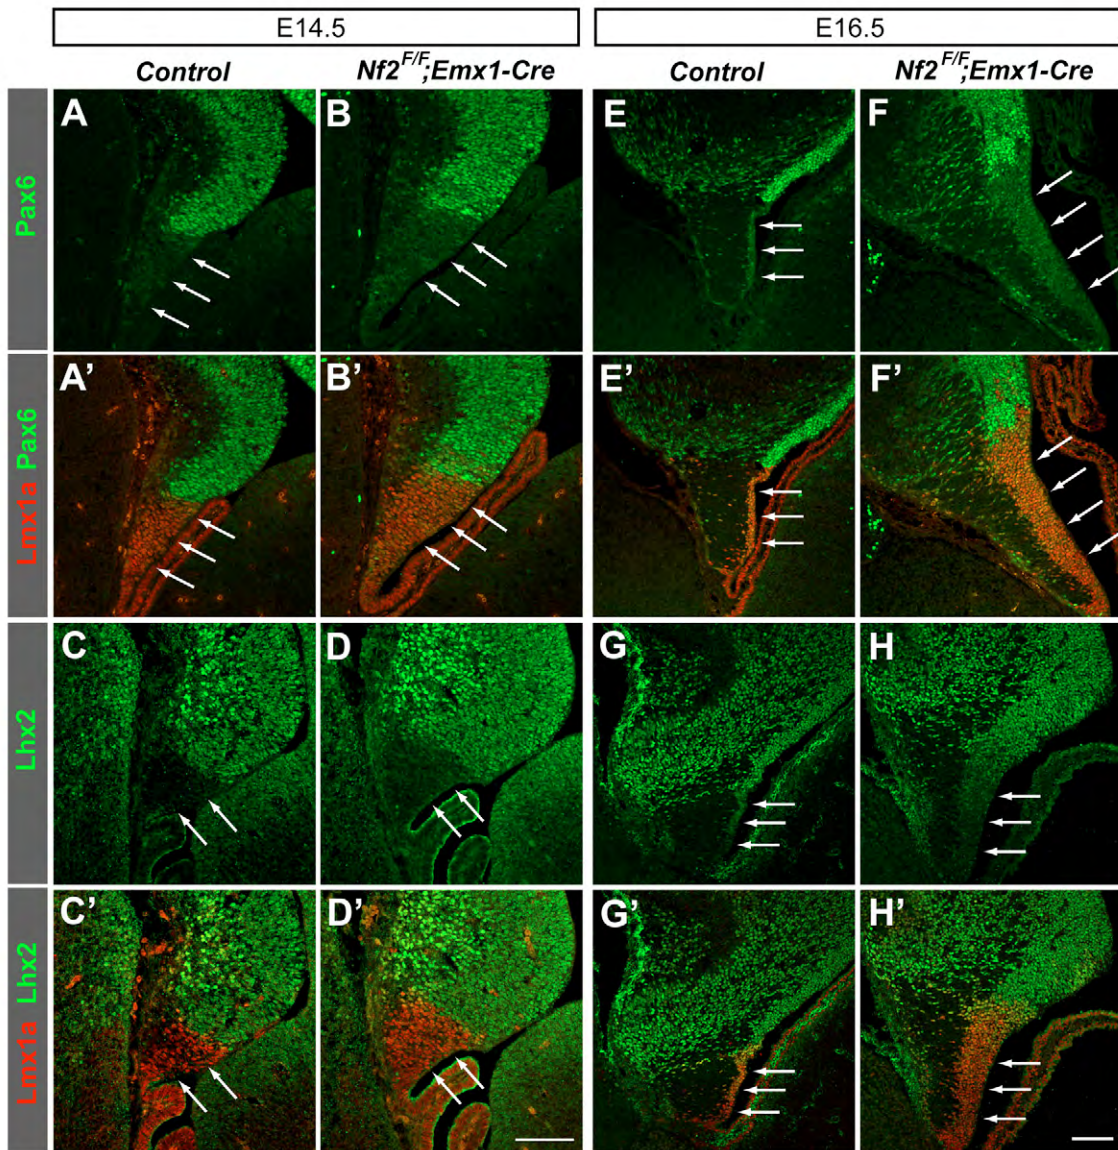

**Fig. S3. The cortex and hem fates are properly specified and maintained in *Nf2* mutants.** (A-H') Co-immunostaining for the hem marker *Lmx1a* with the cortex markers *Pax6* and *Lhx2* shows no overlapping of the hem and cortex markers in *Nf2<sup>F/F</sup>;Emx1-Cre* brains at E14.5 and E16.5. Arrows point to the hem. Scale bars: 100  $\mu$ m.

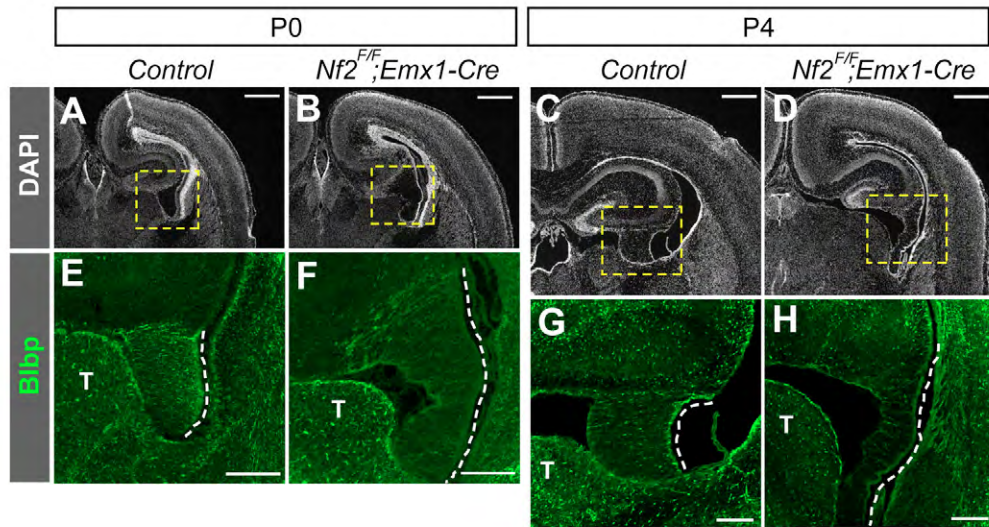

**Fig. S4. Blbp expression fails to be upregulated at the hem of *Nf2* mutants.** (A-H) Images of the dorsal telencephalon (shown by DAPI staining, A-D) and hem (delineated by dashed lines, E-H) show that Blbp expression remains low at the *Nf2<sup>FF</sup>;Emx1-Cre* hem at P0 and P4 (F,H versus E,G). E-H are magnified views of the dashed boxes in A-D, respectively. T, thalamus. Scale bars: 500  $\mu$ m in A-D; 200  $\mu$ m in E-H.

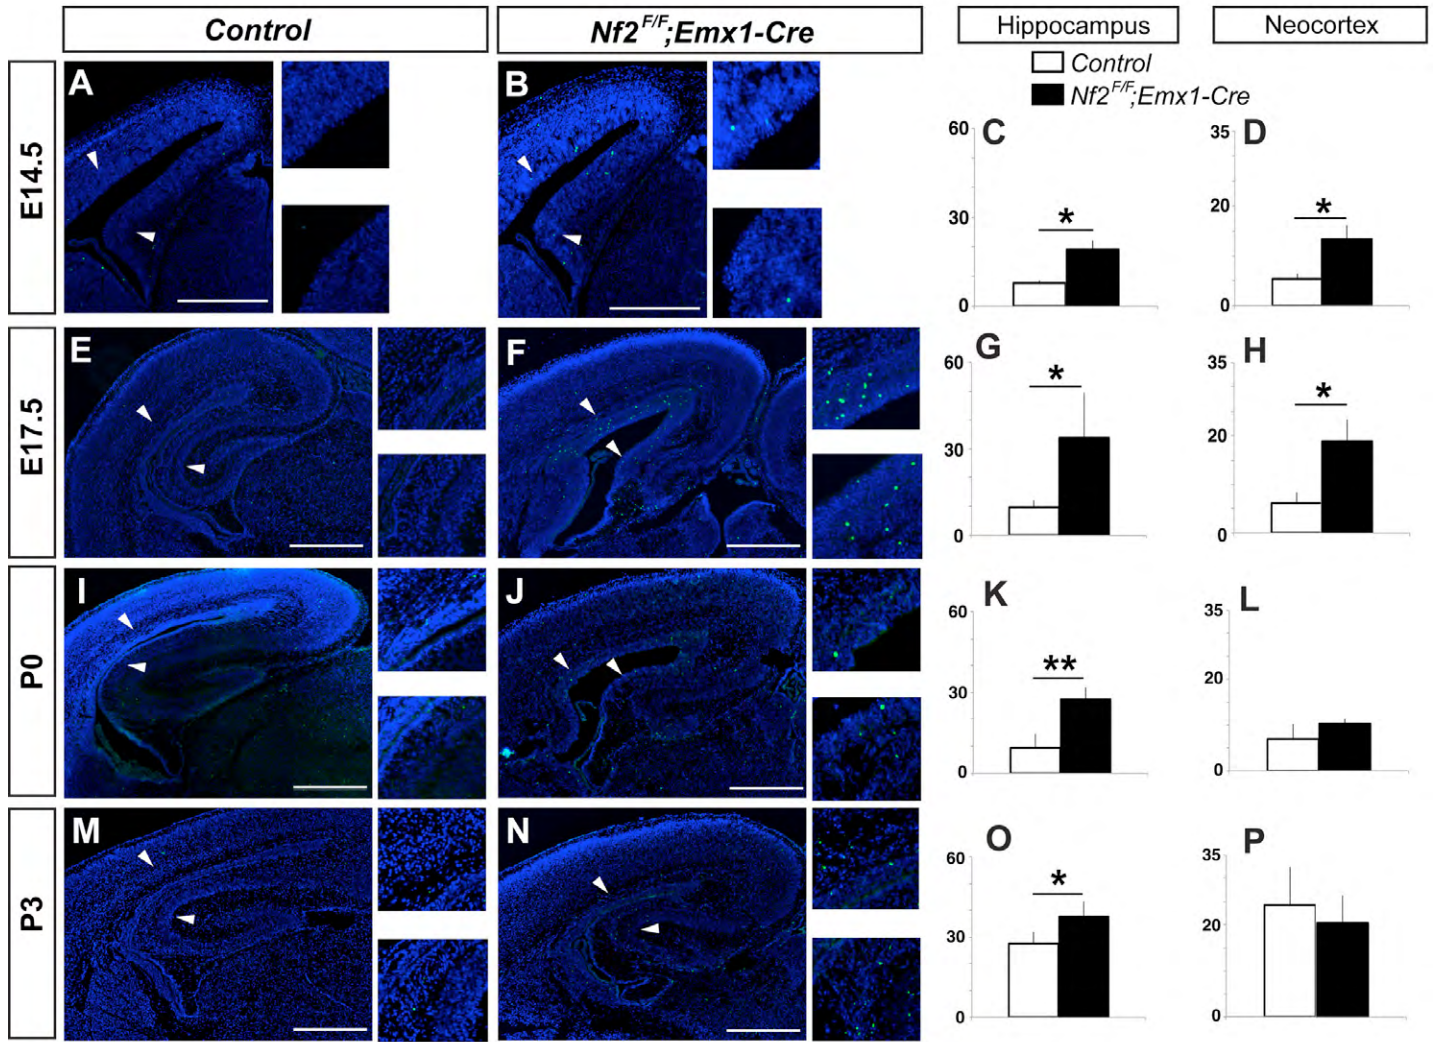

**Fig. S5. Increased cell death in the dorsal telencephalon of *Nf2* mutants during development.** (A-P) TUNEL assays (green signal) on E14.5, E17.5, P0 and P3 brain sections show increased cell death in the hippocampus of *Nf2<sup>F/F</sup>;Emx1-Cre* brains at all these stages (C,G,K,O) and in the neocortex at E14.5 and E17.5 (D,H). Small panels on the right of each large panel are magnified views of the neocortical (top) and hippocampal (bottom) regions indicated by the arrowheads. Values in bar charts are the number of TUNEL<sup>+</sup> cells per section  $\pm$  s.d. ( $n=3$  animals). Blue signals are DAPI staining. Scale bars: 500  $\mu$ m.

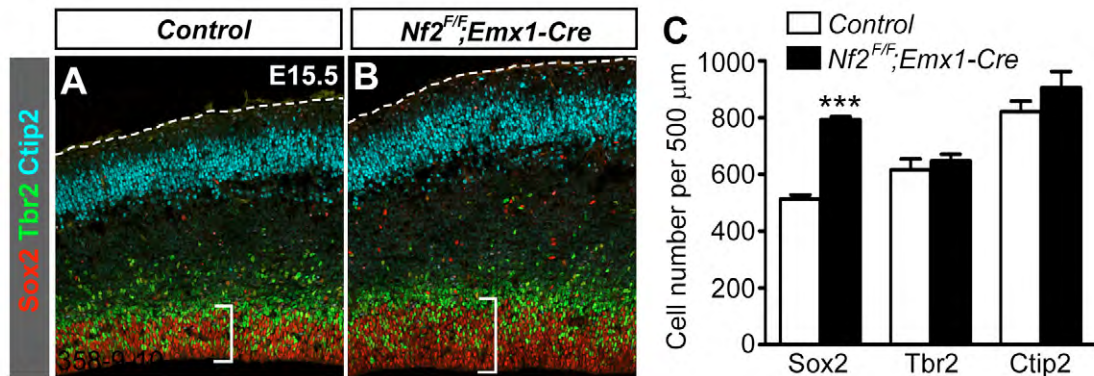

**Fig. S6. Loss of *Nf2* results in an expansion of the neocortical neural progenitor population.** (A,B) Immunostaining with the NPC marker Sox2, the intermediate progenitor marker Tbr2, and the deep layer cortical neuron marker Ctip2 shows expansion of the NPC population in the E15.5 *Nf2<sup>F/F</sup>;Emx1-Cre* neocortex. (C) The numbers of Tbr2<sup>+</sup> and Ctip2<sup>+</sup> cells are not affected by *Nf2* deletion. Note that Sox2<sup>+</sup> Tbr2<sup>-</sup> cells are counted as the 'Sox2' category. Values are the mean number of positive cells per 500  $\mu$ m of neocortical column  $\pm$  s.e.m. ( $n=3$  embryos). \*\*\* $P<0.001$ .

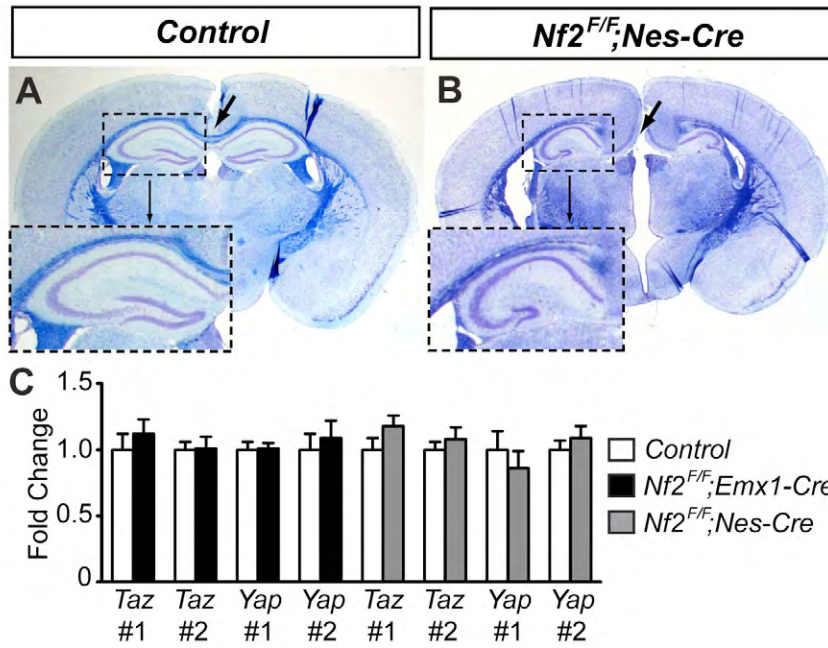

**Fig. S7. Nf2 loss does not affect *Yap* and *Taz* mRNA levels.** (A,B) The dorsal telencephalon of *Nf2<sup>F/F</sup>; Nes-Cre* mice has similar phenotypes to that of *Nf2<sup>F/F</sup>; Emx1-Cre* mice. Luxol Blue staining for myelinated axons (blue) and Cresyl Violet for neuronal cell bodies (purple) show dysgenesis of the corpus callosum (arrows) and malformation of the hippocampus (dashed boxes) in 2-month-old *Nf2<sup>F/F</sup>; Nes-Cre* mice (B), which are similar to those seen in *Nf2<sup>F/F</sup>; Emx1-Cre* mice. (C) Loss of Nf2 does not affect the levels of *Yap* and *Taz* transcripts. Quantitative RT-PCR analysis shows similar levels of *Yap* and *Taz* transcripts in E13.5 *Nf2<sup>F/F</sup>; Emx1-Cre* dorsal telencephalons and *Nf2<sup>F/F</sup>; Nes-Cre* whole brains when compared with their corresponding controls. Two sets of PCR primers were used for each gene (#1 and #2). Values are mean  $\pm$  s.e.m. of three embryos per genotype.

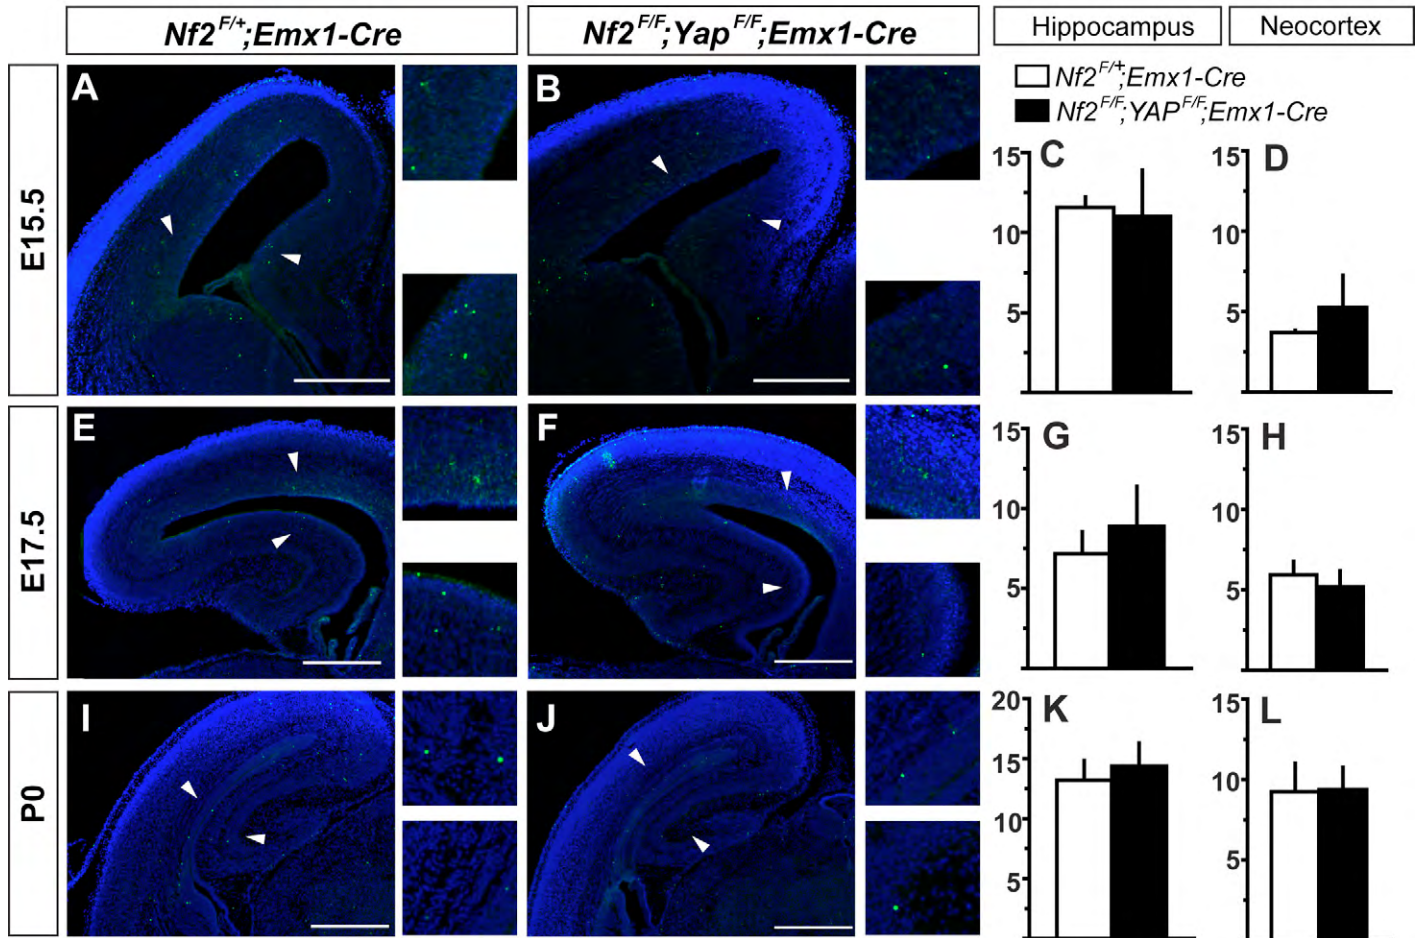

**Fig. S8. *Yap* deletion suppresses the cell death phenotype of *Nf2* mutants.** (A-L) TUNEL assays (green signal) on E15.5, E17.5 and P0 brain sections showing no increase in cell death in *Nf2<sup>F/F</sup>;Yap<sup>F/F</sup>;Emx1-Cre* brains at any of these stages. Small panels on the right of each large panel are magnified views of the neocortical (top) and hippocampal (bottom) regions indicated by the arrowheads. Values in bar charts are the number of TUNEL<sup>+</sup> cells per section  $\pm$  s.e.m. ( $n=3$  animals). Blue signals are DAPI nuclear staining. Scale bars: 500  $\mu$ m.

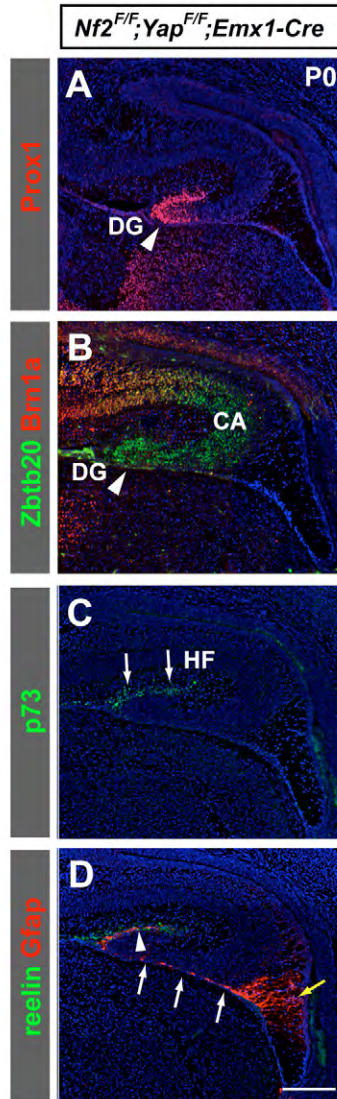

**Fig. S9. *Yap* deletion sometimes partially rescues the hippocampal defects associated with *Nf2* loss.** Some *Nf2<sup>F/F</sup>; Yap<sup>F/F</sup>; Emx1-Cre* brains exhibit a partial rescue of the hippocampal defects found in *Nf2<sup>F/F</sup>; Emx1-Cre* brains. (A) The dentate gyrus (DG), although still smaller than in the control, shows distinguished double blades (arrowhead). (B,C) The pyramidal cell layer (CA) labeled by Zbtb20/ Brn1a and the hippocampal fissure (HF) labeled by p73 are improved compared with those in *Nf2<sup>F/F</sup>; Emx1-Cre* brains, albeit still smaller than those in the control. (D) Gfap<sup>+</sup> glial shaft (white arrows) and fibers (arrowhead) are present at the subpial space, although ectopic fibers are still found at the hem (yellow arrows). Blue signals are DAPI nuclear staining. Scale bar: 200  $\mu$ m.



**Table S1. Primary antibodies for immunostaining**

| <b>Antibody</b>                         | <b>Host species</b> | <b>Vendor</b>                        | <b>Catalog #</b> |
|-----------------------------------------|---------------------|--------------------------------------|------------------|
| Nf2/merlin                              | rabbit              | Santa Cruz                           | sc-332           |
| Nf2                                     | rabbit              | Sigma                                | HPA003097        |
| $\beta$ -catenin (Alexa 647 conjugated) | mouse               | Cell Signaling                       | 9587             |
| ZO-1 (Alexa 488 conjugated)             | mouse               | Invitrogen                           | 339188           |
| aPKC                                    | rabbit              | Santa Cruz                           | sc-216           |
| Phospho-histone H3                      | rabbit              | Chemicon                             | 06-570           |
| Lmx1a                                   | goat                | Santa Cruz                           | sc-54273         |
| Lmx1a                                   | rabbit              | Sigma                                | HPA030088        |
| Ki67                                    | rabbit              | Vector Labs                          | VP-RM04          |
| BrdU                                    | rat                 | Abcam                                | ab6326           |
| Pax6                                    | rabbit              | Covance                              | PRB-278P         |
| Lhx2                                    | goat                | Santa Cruz                           | sc-19342         |
| RC2                                     | mouse               | Developmental Studies Hybridoma Bank | RC2              |
| Blbp                                    | rabbit              | Millipore                            | ABN14            |
| Sox2                                    | goat                | Santa Cruz                           | sc-17320         |
| Sox2                                    | rabbit              | Cell Signaling                       | 3728             |
| Tbr2                                    | rabbit              | Abcam                                | ab23345          |
| Tbr2 (Alexa 647 conjugated)             | rat                 | eBiosciences                         | 51-4875          |
| Ctip2                                   | rat                 | Abcam                                | ab18465          |
| YAP (pS127)                             | rabbit              | Cell Signaling                       | 4911             |
| Zbtb20                                  | rabbit              | Sigma                                | HPA016815        |
| Prox1                                   | goat                | R&D Systems                          | AF2727           |
| Prox1                                   | rabbit              | Millipore                            | AB5475           |
| p73                                     | rabbit              | Santa Cruz                           | sc-7957          |
| Reelin                                  | goat                | R&D Systems                          | AF3820           |
| Calretinin                              | rabbit              | Millipore                            | AB149            |
| Gfap                                    | rabbit              | Dako                                 | Z0334            |
| Nestin                                  | goat                | R&D Systems                          | AF2736           |
| Brn1a                                   | goat                | Santa Cruz                           | 6028-R           |

**Table S2. Quantitative RT-PCR primers**

| <b>Primer</b>     | <b>Sequence</b>          |
|-------------------|--------------------------|
| Steap1 forward    | CTATTCCATCTGTGAGCGACTC   |
| Steap1 reverse    | ACATCTACCCATTTATTCCAGGC  |
| Ctgf forward      | CCTGCCATTACAACACTGTCCT   |
| Ctgf reverse      | GTTCGTGTCCCTTACTTCCTG    |
| Cyr61 forward     | CCGCCTGGTGAAAGAGAC       |
| Cyr61 reverse     | GGGATTTCTTGGTCTTGCTG     |
| Pkp2 forward      | GCAGACCATGTACCAGTATCC    |
| Pkp2 reverse      | CGTTCTGAAGTTTGAGCAGTTG   |
| Clusterin forward | TGGACACAGTGCGGAGAA       |
| Clusterin reverse | TCCGCACGGCTTTTCCT        |
| Wwc2 forward      | GTGCAGATAGGACTCAGATACG   |
| Wwc2 reverse      | AGCAGAGCGACCCTAAAATAC    |
| Ajuba forward     | AGCCTCTACCACACCCAG       |
| Ajuba reverse     | ACAGACACAGCACTTCTCAG     |
| Amotl2 forward    | AGATGGAGACTGTACTGAGGG    |
| Amotl2 reverse    | GAGCCGCTGGATTTTCATTTTC   |
| YAP#1 forward     | ACCAATAGTTCCGATCCCTTTC   |
| YAP#1 reverse     | TGTCTCCTGTATCCATTTTCATCC |
| YAP#2 forward     | ACCATAAGAACAAGACCACATCC  |
| YAP#2 reverse     | CTTCACTGGAGCACTCTGAG     |
| TAZ#1 forward     | GAGAGGATTAGGATGCGTCAAG   |
| TAZ#1 reverse     | GGATCTGAGCTACTGTTGGTG    |
| TAZ#2 forward     | AGACTTCCTCAGCAACATGG     |
| TAZ#2 reverse     | AGTCCCGAGGTCAACATTTG     |

**Table S3. Microarray analysis**[Download Table S3](#)
